# Supplementary material for: A systematic review of prognostic factors predicting survival in patients with spinal bone metastases
Source: Springer Nature journal article supplement (doi:10.1007/s00586-017-5320-3), 2017-10-24
Supplement: MOESM2 [file 15159124]

| **Prognostic factor** | **Positive association** | **No association** | **Level of evidence** |
| --- | --- | --- | --- |
| Charlson comorbidity index | **7** |  | Limited |
| Primary treated with curative intent | **8** |  | Limited |
| Serum Calcium | **9** |  | Limited |
| Time to development of motor deficit | 18 |  | Limited |
| BMI |  | 12 | Limited |
| Diabetes |  | **11** | Limited |
| Epidural compression |  | **7** | Limited |
| Extent of spinal disease |  | 13 | Limited |
| Hemoglobin/White cell count/ serum protein |  | **11** | Limited |
| Hyperalgia |  | **19** | Limited |
| Mass vs non-mass* |  | **9** | Limited |
| Race |  | **7** | Limited |
| Radiculopathy |  | **11** | Limited |
| Renal disease |  | **11** | Limited |
| Time from first symptom to treatment |  | **19** | Limited |

Addendum II. Level of evidence for remaining investigated prognostic factors. Numbers refer to study identification from table 1. BMI: Body Mass Index. *) A mass-type metastasis has a clear boundary outside of the vertebra. Studies with a low risk of bias are in bold.
